# Supplementary material for: Unravelling the radical transition during the carbon-catalyzed oxidation of cyclohexane by in situ electron paramagnetic resonance in the liquid phase
Source: Royal Society of Chemistry journal article supplement (doi:10.1039/c7cy00958e), 2017-01-01
Supplement: c7cy00958e1.pdf [file c7cy00958e1.pdf]

# Unravelling the Radicals Transition during the Carbon-catalyzed Oxidation of Cyclohexane by *In-Situ* Electron Paramagnetic Resonance in Liquid Phase

Xixian Yang<sup>1,2†</sup>, Yonghai Cao<sup>1†</sup>, Hao Yu<sup>1\*</sup>, Hongyu Huang<sup>2</sup>, Hongjuan Wang<sup>1</sup>, Feng Peng<sup>1\*</sup>

<sup>1</sup> *School of Chemistry and Chemical Engineering, South China University of Technology,  
Guangzhou, Guangdong, 510640 (China)*

<sup>2</sup> *Key Laboratory of Renewable Energy, Guangzhou Institute of Energy Conversion, Chinese  
Academy of Sciences, Guangdong, 510640(China)*

† These authors contribute equally.

---

\* Tel. & Fax: +86 20 8711 4916.

E-mail address: [yuhao@scut.edu.cn](mailto:yuhao@scut.edu.cn) (H. Yu); [cefpeng@scut.edu.cn](mailto:cefpeng@scut.edu.cn) (F. Peng).

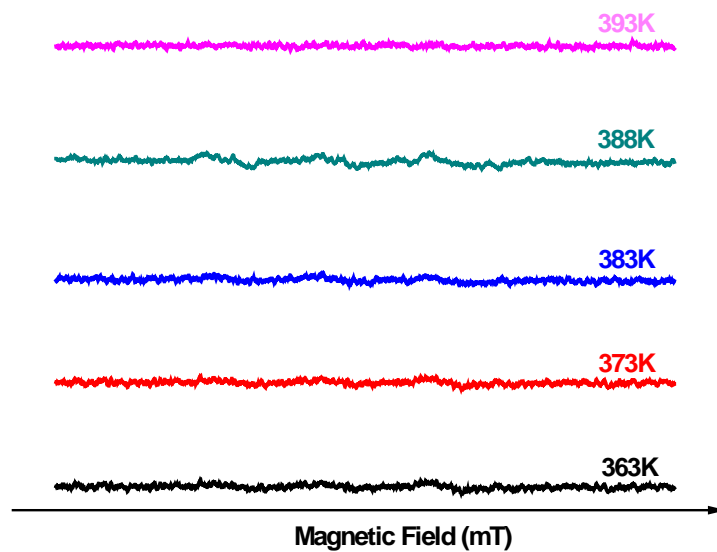

**Figure S1.** *In-situ* EPR spectra of CyH oxidation at different temperature without catalysts. Reaction condition: O<sub>2</sub> saturated, 2ml CyH.

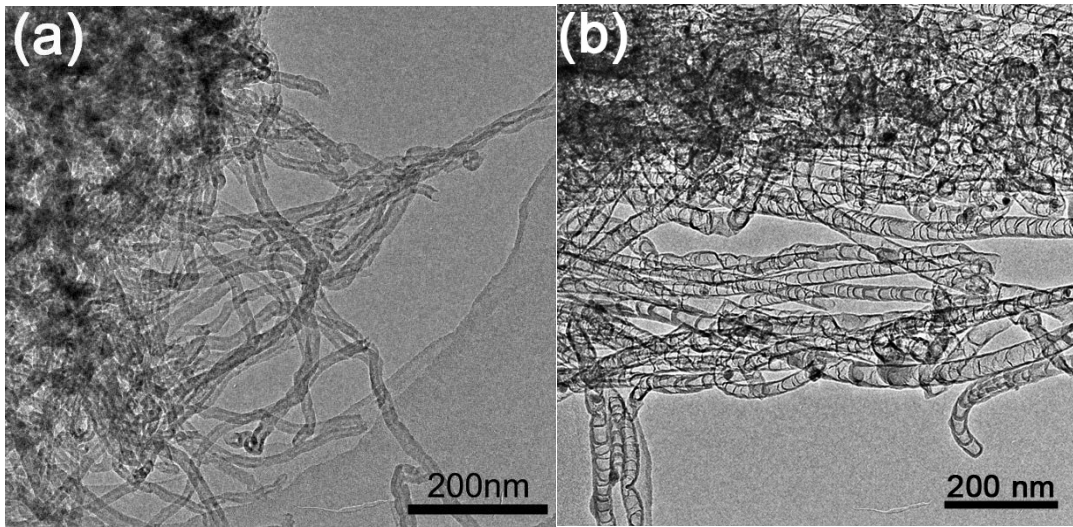

**Figure S2.** TEM images of (a) the CNTs and (b) the N-CNTs

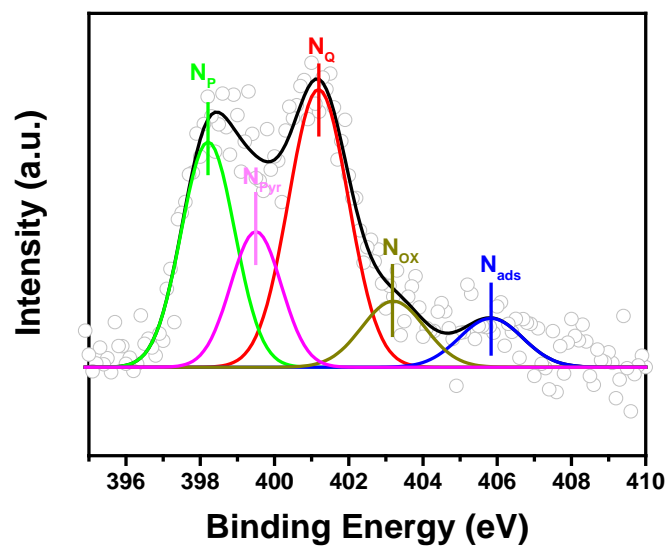

**Figure S3.** N1s XPS spectrum of the N-CNTs used in this work.

**Table S1.** Quantitative XPS analysis of the N-CNTs

| N/(C+N) | $N_p$ | $N_{pyr}$ | $N_q$ | $N_{ox}$ | $N_{ads}$ |
|---------|-------|-----------|-------|----------|-----------|
| (%)     | (%)   | (%)       | (%)   | (%)      | (%)       |
| 4.36    | 28.1  | 16.1      | 38.8  | 9.7      | 7.2       |
